# Supplementary material for: Annotation and analysis of the mitochondrial genome of Coniothyrium glycines, causal agent of red leaf blotch of soybean, reveals an abundance of homing endonucleases
Source: PLoS One. 2018 Nov 7;13(11):e0207062. doi: 10.1371/journal.pone.0207062 (PMC6221350; doi:10.1371/journal.pone.0207062)
Supplement: S2 Table — (XLSX) [file pone.0207062.s002.xlsx]

## Sheet: S4 Table
S2 Table. Sequence similarity betwen mt introns of Coniothyrium glycines and introns of other fungal mitochondrial genomes.
Query (C. glycines)	BLASTN match (Subject) *	Query cover (%)	Expect	Nucl. seq. identity (%)	Align. pos Query	Align. pos Subject	Intron and gene (if annotated)	Organism/definition	Taxonomic affiliation
Introns in protein-coding genes
cox1 intron1	KT946597	98	0	87	1…2053 of 2076	7532…9596 of 55973	cox1/2 intron1	Didymella pinodes strain 165/T mitochondrion, complete genome	Eukaryota; Fungi; Dikarya; Ascomycota; Pezizomycotina; Dothideomycetes; Pleosporomycetidae; Pleosporales; Pleosporineae; Didymellaceae; Didymella
	KY792993	53	0	88	1302…2053 169…531	19779…19029 and 20159…19797 of 68926	cox1 intron1	Pithomyces chartarum mitochondrion, complete genome	Eukaryota; Fungi; Dikarya; Ascomycota; Pezizomycotina; Dothideomycetes; Pleosporomycetidae; Pleosporales; Pleosporineae; Pleosporaceae; Pithomyces
cox1 intron2	KT946597	43	0	95	112…753 and 1996…2401 of 2401	9943…10584 and 10594…10999 of 55973	cox1/2 intron2	Didymella pinodes strain 165/T mitochondrion, complete genome	Eukaryota; Fungi; Dikarya; Ascomycota; Pezizomycotina; Dothideomycetes; Pleosporomycetidae; Pleosporales; Pleosporineae; Didymellaceae; Didymella
	MF784482	31	0	86	1…757	56478…55749 of 135790	cox1 intron2	Bipolaris cookei strain LSLP18 mitochondrion, complete genome	Eukaryota; Fungi; Dikarya; Ascomycota; Pezizomycotina; Dothideomycetes; Pleosporomycetidae; Pleosporales; Pleosporineae; Pleosporaceae; Bipolaris
cox1 intron3	X55026	80	0	85	175…1338 of 1440	48207…49375 of 100314	cox1 intron6	Podospora anserina complete mitochondrial genome	Eukaryota; Fungi; Dikarya; Ascomycota; Pezizomycotina; Sordariomycetes; Sordariomycetidae; Sordariales; Lasiosphaeriaceae; Podospora
	KX453765	99	0	94	465…1097 and 6…467 of 1440	64118…63482 and 64619…64167 of 75911	cox1 intron2	Stemphylium lycopersici strain CIDEFI-216 mitochondrion, complete genome	Eukaryota; Fungi; Dikarya; Ascomycota; Pezizomycotina; Dothideomycetes; Pleosporomycetidae; Pleosporales; Pleosporineae; Pleosporaceae; Stemphylium
	MF784482	100	0	86	465…1097 and 1…467 of 1440	54612…53980 and 55118…54661 of 135790	cox1 intron2	Bipolaris cookei strain LSLP18 mitochondrion, complete genome	Eukaryota; Fungi; Dikarya; Ascomycota; Pezizomycotina; Dothideomycetes; Pleosporomycetidae; Pleosporales; Pleosporineae; Pleosporaceae; Bipolaris
cox1 intron4	MF784482	94	0	88	74…1370 of 1370	50961…49652 of 135790	cox1 intron5	Bipolaris cookei strain LSLP18 mitochondrion, complete genome	Eukaryota; Fungi; Dikarya; Ascomycota; Pezizomycotina; Dothideomycetes; Pleosporomycetidae; Pleosporales; Pleosporineae; Pleosporaceae; Bipolaris
	KT283062	99	0	87	3...1370 of 1370	76571…77957 of 128852	cox1 intron3	Sclerotinia sclerotiorum 1980 UF-70 mitochondrion, complete genome	Eukaryota; Fungi; Dikarya; Ascomycota; Pezizomycotina; Leotiomycetes; Helotiales; Sclerotiniaceae; Sclerotinia
cox1 intron5	HE983613	49	1e-19	71	279…797	23355…23866 of 30232	cox1 intron1	Lachancea mirantina complete mitochondrial genome	Eukaryota; Fungi; Dikarya; Ascomycota; Saccharomycotina; Saccharomycetes; Saccharomycetales; Saccharomycetaceae; Lachancea
cox1 intron6	XM_014217431	26	0	90	490…998 of 1928	2…510 of 512	n/a	Bipolaris maydis ATCC 48331 hypothetical protein mRNA	Eukaryota; Fungi; Dikarya; Ascomycota; Pezizomycotina; Dothideomycetes; Pleosporomycetidae; Pleosporales; Pleosporineae; Pleosporaceae; Bipolaris
	other hits less than 10% query coverage
cox1 intron7	X55026	57	5e-100	75	611…1580 of 1684	57227…58158 of 100314	cox1 intron12	Podospora anserina complete mitochondrial genome	Eukaryota; Fungi; Dikarya; Ascomycota; Pezizomycotina; Sordariomycetes; Sordariomycetidae; Sordariales; Lasiosphaeriaceae; Podospora
	other hits less than 10% query coverage
cox1 intron8	KT283062	76	0	85	406…1351 of 1383	81155…821000 of 128852	cox1 intron5	Sclerotinia sclerotiorum 1980 UF-70 mitochondrion, complete genome	Eukaryota; Fungi; Dikarya; Ascomycota; Pezizomycotina; Leotiomycetes; Helotiales; Sclerotiniaceae; Sclerotinia
cox1 intron9	MF784482	100	0	95	1…1061 of 1061	43330…42270 of 135790	cox1 intron10	Bipolaris cookei strain LSLP18 mitochondrion, complete genome	Eukaryota; Fungi; Dikarya; Ascomycota; Pezizomycotina; Dothideomycetes; Pleosporomycetidae; Pleosporales; Pleosporineae; Pleosporaceae; Bipolaris
	KT380883	99	0	81	1…1054 of 1061	31890…32959 of 190834	cox1 intron9	Chrysoporthe austroafricana mitochondrion, complete genome	Eukaryota; Fungi; Dikarya; Ascomycota; Pezizomycotina; Sordariomycetes; Sordariomycetidae; Diaporthales; Cryphonectriaceae; Cryphonectria-Endothia species complex; Chrysoporthe
	KT946597	95	0	79	23…1039	12836…13858	cox1/2 intron4	Didymella pinodes strain 165/T mitochondrion, complete genome	Eukaryota; Fungi; Dikarya; Ascomycota; Pezizomycotina; Dothideomycetes; Pleosporomycetidae; Pleosporales; Pleosporineae; Didymellaceae; Didymella
cox1 intron10	KT946597	100	0	95	1…1028 of	14041…15067 of 55973	cox1/2 intron4	Didymella pinodes strain 165/T mitochondrion, complete genome	Eukaryota; Fungi; Dikarya; Ascomycota; Pezizomycotina; Dothideomycetes; Pleosporomycetidae; Pleosporales; Pleosporineae; Didymellaceae; Didymella
	KX066187	84	2e-97	75	120…984	60568…61420 of 88750	cox1 intron5	Epichloe hybrida strain Lp1 mitochondrion, complete genome.	Eukaryota; Fungi; Dikarya; Ascomycota; Pezizomycotina; Sordariomycetes; Hypocreomycetidae; Hypocreales; Clavicipitaceae; Epichloe
cox2 intron1	KT946597	87	0	89	1…1019 of 1167	16116…17133 of 55973	cox1/2 intron5	Didymella pinodes strain 165/T mitochondrion, complete genome	Eukaryota; Fungi; Dikarya; Ascomycota; Pezizomycotina; Dothideomycetes; Pleosporomycetidae; Pleosporales; Pleosporineae; Didymellaceae; Didymella
	KT731105	69	2e-63	73	144…954	17951…18759 of 69895	cox2 intron 1	Nectria cinnabarina strain 5175 mitochondrion, complete genome	Eukaryota; Fungi; Dikarya; Ascomycota; Pezizomycotina; Sordariomycetes; Hypocreomycetidae; Hypocreales; Nectriaceae; Nectria
cox2 intron2	XM_007695824	18	2e-153	99	1044…1349 of 1653	1…306 of 306	n/a	Bipolaris oryzae ATCC 44560 hypothetical protein partial mRNA	Eukaryota; Fungi; Dikarya; Ascomycota; Pezizomycotina; Dothideomycetes; Pleosporomycetidae; Pleosporales; Pleosporineae; Pleosporaceae; Bipolaris
	JN088164	23	3e-72	81	2…386 of 1653	54536…54896 of 63363	cox2 intron1	Peltigera malacea mitochondrion, complete genome	Eukaryota; Fungi; Dikarya; Ascomycota; Pezizomycotina; Lecanoromycetes; OSLEUM clade; Lecanoromycetidae; Peltigerales; Peltigerineae; Peltigeraceae; Peltigera
	all other hits less than 15% query coverage
cox2 intron3	KX453765	89	0	84	613…1974	53858…52494 of 75911	cox2 intron2	Stemphylium lycopersici strain CIDEFI-216 mitochondrion, complete genome	Eukaryota; Fungi; Dikarya; Ascomycota; Pezizomycotina; Dothideomycetes; Pleosporomycetidae; Pleosporales; Pleosporineae; Pleosporaceae; Stemphylium
	MF784482	20	1e-86	89	174…441 and 4…131	33771…33506 and 33901…33774	cox2 intron3	Bipolaris cookei strain LSLP18 mitochondrion, complete genome	Eukaryota; Fungi; Dikarya; Ascomycota; Pezizomycotina; Dothideomycetes; Pleosporomycetidae; Pleosporales; Pleosporineae; Pleosporaceae; Bipolaris
	KT946597	18	1e-62	86	174…407 and 6…131	17801…18032 and 17674…17798	cox1/2 intron6	Didymella pinodes strain 165/T mitochondrion, complete genome	Eukaryota; Fungi; Dikarya; Ascomycota; Pezizomycotina; Dothideomycetes; Pleosporomycetidae; Pleosporales; Pleosporineae; Didymellaceae; Didymella
cox3 intron1	no significant siilarity found
cox3 intron2	MF784482	88	0	95	124…955 of 1187	20956…21782 of 135790	cox3 intron5	Bipolaris cookei strain LSLP18 mitochondrion, complete genome	Eukaryota; Fungi; Dikarya; Ascomycota; Pezizomycotina; Dothideomycetes; Pleosporomycetidae; Pleosporales; Pleosporineae; Pleosporaceae; Bipolaris
	EU053989	69	0	86	193…1012	41167…41984 of 49761	cox3 intron1	Phaeosphaeria nodorum SN15 mitochondrion, complete genome	Eukaryota; Fungi; Dikarya; Ascomycota; Pezizomycotina; Dothideomycetes; Pleosporomycetidae; Pleosporales; Pleosporineae; Phaeosphaeriaceae; Parastagonospora
cob intron1	MF784482	96	0	85	310…958 of 1117	112506…111870 of 135790	cob intron5	Bipolaris cookei strain LSLP18 mitochondrion, complete genome	Eukaryota; Fungi; Dikarya; Ascomycota; Pezizomycotina; Dothideomycetes; Pleosporomycetidae; Pleosporales; Pleosporineae; Pleosporaceae; Bipolaris
	X55026	66	2e-112	77	79…822 of 1117	35436…34684 of 100314	cob intron 3	Podospora anserina complete mitochondrial genome	Eukaryota; Fungi; Dikarya; Ascomycota; Pezizomycotina; Sordariomycetes; Sordariomycetidae; Sordariales; Lasiosphaeriaceae; Podospora
cob intron2	JQ446323	55	0	86	1344…2127 and 4…414 of 2154	970…184 and 1405…978 of 1589	cob intron	Alternaria alternata isolate EV-3-1S cytochrome b (cytb) gene, partial cds; mitochondrial	Eukaryota; Fungi; Dikarya; Ascomycota; Pezizomycotina; Dothideomycetes; Pleosporomycetidae; Pleosporales; Pleosporineae; Pleosporaceae; Alternaria; Alternaria alternata group
	KJ934234.1	55	0	86	1344…2127 and 4…414 of 2154	5226…4440 and 5661…5234	cob intron	Pleospora tarda cytochrome b gene, partial cds; mitochondrial	Eukaryota; Fungi; Dikarya; Ascomycota; Pezizomycotina;Dothideomycetes; Pleosporomycetidae; Pleosporales; Pleosporineae; Pleosporaceae; Stemphylium
	KJ934233	55	0	86	1344…2127 and 4…414 of 2154	2295…1509 and 2730…2303	cob intron	Stemphylium vesicarium cytochrome b gene, partial cds; mitochondrial	Eukaryota; Fungi; Dikarya; Ascomycota; Pezizomycotina; Dothideomycetes; Pleosporomycetidae; Pleosporales; Pleosporineae; Pleosporaceae; Stemphylium
	KY792993	9	7e-35	82	74…267 of 2154	61170…61371	cob intron1	Pithomyces chartarum mitochondrion, complete genome	Eukaryota; Fungi; Dikarya; Ascomycota; Pezizomycotina; Dothideomycetes; Pleosporomycetidae; Pleosporales; Pleosporineae; Pleosporaceae; Pithomyces
	KT946597	9	4e-32	81	74…269 of 2154	23571…23370	cob intron3	Didymella pinodes strain 165/T mitochondrion, complete genome	Eukaryota; Fungi; Dikarya; Ascomycota; Pezizomycotina; Dothideomycetes; Pleosporomycetidae; Pleosporales; Pleosporineae; Didymellaceae; Didymella
	MF784482	9	1e-27	80	74…267 of 2154	109245…109045	cob intron4	Bipolaris cookei strain LSLP18 mitochondrion, complete genome	Eukaryota; Fungi; Dikarya; Ascomycota; Pezizomycotina; Dothideomycetes; Pleosporomycetidae; Pleosporales; Pleosporineae; Pleosporaceae; Bipolaris
	no significant similarity found for bp 415…1343
cob intron3	DQ209284	76	0	87	1…2141 of 3432	3399…2141 of 6844	cob intron2	Alternaria solani cytochrome b (cytb) gene, exons 1 through 5 and partial cds; mitochondrial	Eukaryota; Fungi; Dikarya; Ascomycota; Pezizomycotina; Dothideomycetes; Pleosporomycetidae; Pleosporales; Pleosporineae; Pleosporaceae; Alternaria
	MF784482	77	0	89	23…1176	104952…103819 of 135790	cob intron3	Bipolaris cookei strain LSLP18 mitochondrion, complete genome	Eukaryota; Fungi; Dikarya; Ascomycota; Pezizomycotina; Dothideomycetes; Pleosporomycetidae; Pleosporales; Pleosporineae; Pleosporaceae; Bipolaris
	KX453765.1	21	0	90	1355…2037	48392…49074 of 75911	free standing orf following cob	Stemphylium lycopersici strain CIDEFI-216 mitochondrion, complete genome
cob intron4	MF784482	99	1e-141	90	132…535 and 6…139 of 535	94459…94056 and 95324…95109 of 135790	cob intron1	Bipolaris cookei strain LSLP18 mitochondrion, complete genome	Eukaryota; Fungi; Dikarya; Ascomycota; Pezizomycotina; Dothideomycetes; Pleosporomycetidae; Pleosporales; Pleosporineae; Pleosporaceae; Bipolaris
	DQ919067	74	9e-138	89	134…530	420…24 of 6701	cob intron1	Pyrenophora teres cytochrome b (cyt b) gene, partial cds; mitochondrial	Eukaryota; Fungi; Dikarya; Ascomycota; Pezizomycotina; Dothideomycetes; Pleosporomycetidae; Pleosporales; Pleosporineae; Pleosporaceae; Pyrenophora
cob intron5	no significant similarity found
atp6 intron1	MF784482	99	0	92	3…899 of 1363	84196…85089 of 135790	atp6 intron1	Bipolaris cookei strain LSLP18 mitochondrion, complete genome	Eukaryota; Fungi; Dikarya; Ascomycota; Pezizomycotina; Dothideomycetes; Pleosporomycetidae; Pleosporales; Pleosporineae; Pleosporaceae; Bipolaris
nad1 intron1	MF784482	95	0	95	1172…2042 of 3377	2721…1851 of 135790	nad1 intron1	Bipolaris cookei strain LSLP18 mitochondrion, complete genome	Eukaryota; Fungi; Dikarya; Ascomycota; Pezizomycotina; Dothideomycetes; Pleosporomycetidae; Pleosporales; Pleosporineae; Pleosporaceae; Bipolaris
	KX453765	99	0	94	1172…1743 and 69…576 of 3377	29827…30398 and 28826…29333 of 75911	nad1 intron1	Stemphylium lycopersici strain CIDEFI-216 mitochondrion, complete genome
nad1 intron2	HQ259115	37	5e-141	78	178…982 of 2174	75393…74568 of 93722	nad1 intron3	Moniliophthora roreri mitochondrion, complete genome	Eukaryota; Fungi; Dikarya; Basidiomycota; Agaricomycotina; Agaricomycetes; Agaricomycetidae; Agaricales; Marasmiaceae; Moniliophthora
	AP017926	36	5e-61	73	174…975 of 2174	5942…5168 of 63479	cox1 intron3	Fomitopsis palustris mitochondrial DNA, complete sequence, strain: FFPRI 0507	Eukaryota; Fungi; Dikarya; Basidiomycota; Agaricomycotina; Agaricomycetes; Polyporales; Fomitopsis
nad1 intron3	EU053989	99	0	78	4…1167 of 1173	30113…31297 of 49761	nad1 intron1	Phaeosphaeria nodorum SN15 mitochondrion, complete genome	Eukaryota; Fungi; Dikarya; Ascomycota; Pezizomycotina; Dothideomycetes; Pleosporomycetidae; Pleosporales; Pleosporineae; Phaeosphaeriaceae; Parastagonospora
	KT946597	91	0	80	60…954	30206…29300 of 55973	nad1 intron1	Didymella pinodes strain 165/T mitochondrion, complete genome	Eukaryota; Fungi; Dikarya; Ascomycota; Pezizomycotina; Dothideomycetes; Pleosporomycetidae; Pleosporales; Pleosporineae; Didymellaceae; Didymella
nad4L intron1	EU053989	97	0	81	1…1431 of 1468	35877...37287 of 49761	orf3 protein (bewtween nad5 & nad4L)	Phaeosphaeria nodorum SN15 mitochondrion, complete genome	Eukaryota; Fungi; Dikarya; Ascomycota; Pezizomycotina; Dothideomycetes; Pleosporomycetidae; Pleosporales; Pleosporineae; Phaeosphaeriaceae; Parastagonospora
	KT283062	91	0	81	112…1447 of 1468	14877...13541 of 128852	freestanding orf	Sclerotinia sclerotiorum 1980 UF-70 mitochondrion, complete genome	Eukaryota; Fungi; Dikarya; Ascomycota; Pezizomycotina; Leotiomycetes; Helotiales; Sclerotiniaceae; Sclerotinia
	KC832409	75	0	82	112…1114 of 1468	2159…1163 of 82212	orf between nad4L&5	Botryotinia fuckeliana B05.10 mitochondrion, complete genome	Eukaryota; Fungi; Dikarya; Ascomycota; Pezizomycotina; Leotiomycetes; Helotiales; Sclerotiniaceae; Botrytis
	KT946595	92	0	77	37…1394 of 1468	19541…18184 of 51156	nad4L intron1	Peltigera dolichorrhiza mitochondrion, complete genome	Eukaryota; Fungi; Dikarya; Ascomycota; Pezizomycotina; Lecanoromycetes; OSLEUM clade; Lecanoromycetidae; Peltigerales; Peltigerineae; Peltigeraceae; Peltigera
nad5 intron1	KT946597	41	0	86	3…1158 of 2944	32885…34020 of 55973	nad5 intron1	Didymella pinodes strain 165/T mitochondrion, complete genome	Eukaryota; Fungi; Dikarya; Ascomycota; Pezizomycotina; Dothideomycetes; Pleosporomycetidae; Pleosporales; Pleosporineae; Didymellaceae; Didymella
nad5 intron2	MF784482	99	0	95	2…1013 of 1013	129515…128504 of 135790	nad5 intron5	Bipolaris cookei strain LSLP18 mitochondrion, complete genome	Eukaryota; Fungi; Dikarya; Ascomycota; Pezizomycotina; Dothideomycetes; Pleosporomycetidae; Pleosporales; Pleosporineae; Pleosporaceae; Bipolaris
nad5 intron3	MF784482	99	0	86	64…1276 of 1276	128204…126986 of 135790	nad5 intron4	Bipolaris cookei strain LSLP18 mitochondrion, complete genome	Eukaryota; Fungi; Dikarya; Ascomycota; Pezizomycotina; Dothideomycetes; Pleosporomycetidae; Pleosporales; Pleosporineae; Pleosporaceae; Bipolaris
	KY792993	99	0	84	1..1269 of 1276	55139…56406 of 68926	nad5 intron2	Pithomyces chartarum mitochondrion, complete genome	Eukaryota; Fungi; Dikarya; Ascomycota; Pezizomycotina; Dothideomycetes; Pleosporomycetidae; Pleosporales; Pleosporineae; Pleosporaceae; Pithomyces
nad5 intron4	MF784482	96	0	86	989…1873 of 1882	124858…123974 of 135790	nad5 intron3	Bipolaris cookei strain LSLP18 mitochondrion, complete genome	Eukaryota; Fungi; Dikarya; Ascomycota; Pezizomycotina; Dothideomycetes; Pleosporomycetidae; Pleosporales; Pleosporineae; Pleosporaceae; Bipolaris
	all others less than 10% query cover
rnl intron1	MF784482	93	0	97	187…850 and 908…1512 and 1…142	71657…72315 and 72312…72943 and 71511…71652	rnl inton1	Bipolaris cookei strain LSLP18 mitochondrion, complete genome	Eukaryota; Fungi; Dikarya; Ascomycota; Pezizomycotina; Dothideomycetes; Pleosporomycetidae; Pleosporales; Pleosporineae; Pleosporaceae; Bipolaris
rnl intron2	KJ434027.1	21	1e-61	82	18…325 and 35…280 and 56…278	3089…3422 and 74490…74738 and 11002…11220	rnl intron4 cob intron1 rnl intron8	Sclerotinia borealis strain F-4128 mitochondrion, complete genome	Eukaryota; Fungi; Dikarya; Ascomycota; Pezizomycotina; Leotiomycetes; Helotiales; Sclerotiniaceae; Sclerotinia
	MF784482	14	8e-43	83	32…241	71541…71749	rnl gene	Bipolaris cookei strain LSLP18 mitochondrion, complete genome	Eukaryota; Fungi; Dikarya; Ascomycota; Pezizomycotina; Dothideomycetes; Pleosporomycetidae; Pleosporales; Pleosporineae; Pleosporaceae; Bipolaris
rnl intron3	KT428651.1	8	2e-27	77	230…473 3200…3248	131505…131769 95456…95504 of 158413	n/a and rns intron3	Cryphonectria parasitica mitochondrion, complete genome	Eukaryota; Fungi; Dikarya; Ascomycota; Pezizomycotina; Sordariomycetes; Sordariomycetidae; Diaporthales; Cryphonectriaceae; Cryphonectria-Endothia species complex; Cryphonectria
	KT380883.1	7	4e-24	79	267…473 and 3200…3248	148167…148389 and 109575…109623	n/a and n/a	Chrysoporthe austroafricana mitochondrion, complete genome	Eukaryota; Fungi; Dikarya; Ascomycota; Pezizomycotina; Sordariomycetes; Sordariomycetidae; Diaporthales; Cryphonectriaceae; Cryphonectria-Endothia species complex; Chrysoporthe
	all other hits 2% or less query coverage
